# Supplementary material for: Frequently expressed glypican‐3 as a promising novel therapeutic target for osteosarcomas
Source: PubMed Central journal article supplement — Cancer Sci. 2022 Aug 21;113(10):3618–32. doi: 10.1111/cas.15521 (PMC9530858; doi:10.1111/cas.15521), 2022-08-21
Supplement: CAS-113-3618-s002.pdf [file CAS-113-3618-s002.pdf]

**Supplementary Table S1.**

| <b>Sample ID</b>      | <b>Total number of sequenced reads</b> | <b>Total number of uniquely mapped non-duplicate reads</b> | <b>Total number of covered bases</b> | <b>Median coverage (and range) per base</b> | <b>Percentage of targeted bases with coverage &gt;200</b> |
|-----------------------|----------------------------------------|------------------------------------------------------------|--------------------------------------|---------------------------------------------|-----------------------------------------------------------|
| <b>Osteoblastic</b>   |                                        |                                                            |                                      |                                             |                                                           |
| <b>OS</b>             |                                        |                                                            |                                      |                                             |                                                           |
| <b>1</b>              | 78162786                               | 57374475                                                   | 2688927                              | 1583(0-9562)                                | 97.68                                                     |
| <b>2</b>              | 42343816                               | 30624504                                                   | 2688606                              | 842(0-9226)                                 | 91.06                                                     |
| <b>3</b>              | 54553830                               | 41293994                                                   | 2688469                              | 1033(0-10208)                               | 98.23                                                     |
| <b>4</b>              | 60115584                               | 46167862                                                   | 2689512                              | 1305(0-6212)                                | 97.37                                                     |
| <b>5</b>              | 66068070                               | 50590563                                                   | 2688710                              | 1281(0-17122)                               | 96.67                                                     |
| <b>6</b>              | 52646996                               | 38906717                                                   | 2688555                              | 1179(0-6407)                                | 96.8                                                      |
| <b>7</b>              | 77888456                               | 56638929                                                   | 2688759                              | 1472(0-18804)                               | 97.52                                                     |
| <b>8</b>              | 53000830                               | 42208802                                                   | 2688479                              | 1480(0-14042)                               | 95.74                                                     |
| <b>9</b>              | 60926136                               | 48145550                                                   | 2689341                              | 1424(0-6960)                                | 97.25                                                     |
| <b>10</b>             | 52529878                               | 38915874                                                   | 2688603                              | 1101(0-5596)                                | 95.97                                                     |
| <b>11</b>             | 72629840                               | 52018116                                                   | 2689132                              | 1514(0-9046)                                | 98.06                                                     |
| <b>12</b>             | 76676114                               | 54269584                                                   | 2688839                              | 1427(0-4985)                                | 97.52                                                     |
| <b>13</b>             | 54839798                               | 43117797                                                   | 2688498                              | 1288(0-5913)                                | 97.34                                                     |
| <b>14</b>             | 76610172                               | 56103756                                                   | 2688743                              | 1639(0-8551)                                | 98.51                                                     |
| <b>15</b>             | 62740242                               | 43083827                                                   | 2689006                              | 1171(0-4820)                                | 96.98                                                     |
| <b>16</b>             | 80357252                               | 59019469                                                   | 2689259                              | 1613(0-9111)                                | 98.18                                                     |
| <b>17</b>             | 72385074                               | 52810447                                                   | 2689211                              | 1362(0-9245)                                | 97.27                                                     |
| <b>18</b>             | 67257524                               | 44159544                                                   | 2689484                              | 1210(0-26469)                               | 97.6                                                      |
| <b>19</b>             | 84875116                               | 60547033                                                   | 2687275                              | 1879(0-11530)                               | 98.35                                                     |
| <b>20</b>             | 75407976                               | 55463257                                                   | 2689405                              | 1626(0-16995)                               | 98.03                                                     |
| <b>21</b>             | 76521488                               | 53764057                                                   | 2688531                              | 1474(0-7533)                                | 97.3                                                      |
| <b>Chondroblastic</b> |                                        |                                                            |                                      |                                             |                                                           |
| <b>OS</b>             |                                        |                                                            |                                      |                                             |                                                           |
| <b>22</b>             | 76236968                               | 48305066                                                   | 2688998                              | 1627(0-8505)                                | 97.38                                                     |
| <b>23</b>             | 76372648                               | 54909260                                                   | 2688785                              | 1534(0-13621)                               | 97.63                                                     |
| <b>24</b>             | 62857048                               | 46781681                                                   | 2689438                              | 1222(0-30499)                               | 97.63                                                     |
