# Supplementary material for: Frequently expressed glypican‐3 as a promising novel therapeutic target for osteosarcomas
Source: PubMed Central journal article supplement — Cancer Sci. 2022 Aug 21;113(10):3618–32. doi: 10.1111/cas.15521 (PMC9530858; doi:10.1111/cas.15521), 2022-08-21
Supplement: CAS-113-3618-s003.pdf [file CAS-113-3618-s003.pdf]

## Supplementary Table S2.

### A

|               |               |               |               |               |               |              |
|---------------|---------------|---------------|---------------|---------------|---------------|--------------|
| <i>ABCB1</i>  | <i>ABCC1</i>  | <i>ABCC2</i>  | <i>ABCC3</i>  | <i>ABCC4</i>  | <i>ABCC6</i>  | <i>ABCG2</i> |
| <i>ABL1</i>   | <i>ABL2</i>   | <i>ACTG1</i>  | <i>ACVR1B</i> | <i>ACVR2A</i> | <i>ADGRA2</i> | <i>AIP*</i>  |
| <i>AKT1</i>   | <i>AKT2</i>   | <i>AKT3</i>   | <i>ALK*</i>   | <i>AMER1</i>  | <i>APC*</i>   | <i>ARAF</i>  |
| <i>ARFRP1</i> | <i>ARID1A</i> | <i>ARID1B</i> | <i>ARID2</i>  | <i>AR</i>     | <i>ASXL1</i>  | <i>ATIC</i>  |
| <i>ATM*</i>   | <i>ATRX</i>   | <i>ATR</i>    | <i>AURKA</i>  | <i>AURKB</i>  | <i>AXIN1</i>  | <i>AXIN2</i> |
| <i>AXL</i>    |               |               |               |               |               |              |

### B

|              |               |                |              |               |               |               |
|--------------|---------------|----------------|--------------|---------------|---------------|---------------|
| <i>BAP1*</i> | <i>BARD1*</i> | <i>BAX</i>     | <i>BCL10</i> | <i>BCL11A</i> | <i>BCL2L1</i> | <i>BCL2L2</i> |
| <i>BCL2</i>  | <i>BCL6</i>   | <i>BCORL1</i>  | <i>BCOR</i>  | <i>BCR</i>    | <i>BIRC5</i>  | <i>BLCAP</i>  |
| <i>BLK</i>   | <i>BLM*</i>   | <i>BMPRIA*</i> | <i>BRAF</i>  | <i>BRCA1*</i> | <i>BRCA2*</i> | <i>BRD3</i>   |
| <i>BRD4</i>  | <i>BRIP1*</i> | <i>BTG1</i>    | <i>BTK</i>   | <i>BUB1B*</i> | <i>BUB1*</i>  | <i>BUB3*</i>  |

### C

|                |                |                |                |                |               |               |
|----------------|----------------|----------------|----------------|----------------|---------------|---------------|
| <i>C8orf34</i> | <i>CAMK2G</i>  | <i>CAMKK2</i>  | <i>CARD11</i>  | <i>CASP7</i>   | <i>CASP8</i>  | <i>CBFB</i>   |
| <i>CBL</i>     | <i>CBR1</i>    | <i>CBR3</i>    | <i>CCND1</i>   | <i>CCND2</i>   | <i>CCND3</i>  | <i>CCNE1</i>  |
| <i>CD19</i>    | <i>CD22</i>    | <i>CD274</i>   | <i>CD33</i>    | <i>CD52</i>    | <i>CD74</i>   | <i>CD79A</i>  |
| <i>CD79B</i>   | <i>CDA</i>     | <i>CDC25C</i>  | <i>CDC42</i>   | <i>CDC73*</i>  | <i>CDH1*</i>  | <i>CDK12</i>  |
| <i>CDK1</i>    | <i>CDK2</i>    | <i>CDK4*</i>   | <i>CDK5</i>    | <i>CDK6</i>    | <i>CDK7</i>   | <i>CDK8</i>   |
| <i>CDK9</i>    | <i>CDKN1A</i>  | <i>CDKN1B</i>  | <i>CDKN1C*</i> | <i>CDKN2A*</i> | <i>CDKN2B</i> | <i>CDKN2C</i> |
| <i>CEBPA*</i>  | <i>CEP57*</i>  | <i>CHD2</i>    | <i>CHD3</i>    | <i>CHD4</i>    | <i>CHEK1</i>  | <i>CHEK2*</i> |
| <i>CIC</i>     | <i>CNTNAP1</i> | <i>CNTNAP2</i> | <i>COL22A1</i> | <i>COMT</i>    | <i>COPS3</i>  | <i>CREBBP</i> |
| <i>CRKL</i>    | <i>CRLF2</i>   | <i>CSF1R</i>   | <i>CSMD1</i>   | <i>CSMD3</i>   | <i>CTCF</i>   | <i>CTIF</i>   |
| <i>CTLA4</i>   | <i>CTNNA1</i>  | <i>CTNNB1</i>  | <i>CUL3</i>    | <i>CXCL10</i>  | <i>CXCL8</i>  | <i>CXCR4</i>  |
| <i>CYLD*</i>   | <i>CYP19A1</i> | <i>CYP11A1</i> | <i>CYP11A2</i> | <i>CYP11B1</i> | <i>CYP2A6</i> | <i>CYP2B6</i> |
| <i>CYP2C19</i> | <i>CYP2C8</i>  | <i>CYP2C9</i>  | <i>CYP2D6</i>  | <i>CYP2E1</i>  | <i>CYP3A4</i> | <i>CYP3A5</i> |
| <i>CYP4B1</i>  |                |                |                |                |               |               |

### D

|               |              |             |                |                |               |                |
|---------------|--------------|-------------|----------------|----------------|---------------|----------------|
| <i>DAXX</i>   | <i>DDB2*</i> | <i>DDR2</i> | <i>DHFR</i>    | <i>DICER1*</i> | <i>DIRAS3</i> | <i>DIS3L2*</i> |
| <i>DNMT3A</i> | <i>DOT1L</i> | <i>DPYD</i> | <i>DYNC2H1</i> |                |               |                |

### E

|               |               |              |               |               |               |               |
|---------------|---------------|--------------|---------------|---------------|---------------|---------------|
| <i>E2F1</i>   | <i>EGFR*</i>  | <i>EGF</i>   | <i>EML4</i>   | <i>EMSY</i>   | <i>ENOSF1</i> | <i>EP300</i>  |
| <i>EPCAM*</i> | <i>EPHA3</i>  | <i>EPHA5</i> | <i>EPHA7</i>  | <i>EPHB1</i>  | <i>EPHX1</i>  | <i>ERBB2</i>  |
| <i>ERBB3</i>  | <i>ERBB4</i>  | <i>ERCC1</i> | <i>ERCC2*</i> | <i>ERCC3*</i> | <i>ERCC4*</i> | <i>ERCC5*</i> |
| <i>ERG</i>    | <i>ERRFI1</i> | <i>ESR1</i>  | <i>ETV1</i>   | <i>ETV4</i>   | <i>ETV5</i>   | <i>ETV6</i>   |
| <i>EWSR1</i>  | <i>EXT1*</i>  | <i>EXT2*</i> | <i>EZH2*</i>  |               |               |               |

### F

|               |               |               |               |                |               |               |
|---------------|---------------|---------------|---------------|----------------|---------------|---------------|
| <i>FAM46C</i> | <i>FANCA*</i> | <i>FANCB*</i> | <i>FANCC*</i> | <i>FANCD2*</i> | <i>FANCE*</i> | <i>FANCF*</i> |
| <i>FANCG*</i> | <i>FANCI*</i> | <i>FANCL*</i> | <i>FANCM*</i> | <i>FAS</i>     | <i>FAT1</i>   | <i>FBXW7</i>  |
| <i>FCGR3A</i> | <i>FGF10</i>  | <i>FGF14</i>  | <i>FGF19</i>  | <i>FGF23</i>   | <i>FGF3</i>   | <i>FGF4</i>   |
| <i>FGF6</i>   | <i>FGFR1</i>  | <i>FGFR2</i>  | <i>FGFR3</i>  | <i>FGFR4</i>   | <i>FH*</i>    | <i>FLCN*</i>  |
| <i>FLT1</i>   | <i>FLT3</i>   | <i>FLT4</i>   | <i>FOLR3</i>  | <i>FOXA1</i>   | <i>FOXA2</i>  | <i>FOXL2</i>  |
| <i>FOXO1</i>  | <i>FOXP1</i>  | <i>FRS2</i>   | <i>FUBP1</i>  | <i>FYN</i>     |               |               |

### G

|               |              |               |               |              |              |              |
|---------------|--------------|---------------|---------------|--------------|--------------|--------------|
| <i>GABRA6</i> | <i>GATA1</i> | <i>GATA2*</i> | <i>GATA3</i>  | <i>GATA4</i> | <i>GATA6</i> | <i>GGH</i>   |
| <i>GID4</i>   | <i>GLI1</i>  | <i>GLI2</i>   | <i>GNA11</i>  | <i>GNA13</i> | <i>GNAQ</i>  | <i>GNAS</i>  |
| <i>GOPC</i>   | <i>GPC3*</i> | <i>GRB2</i>   | <i>GRIN2A</i> | <i>GRM3</i>  | <i>GSK3B</i> | <i>GSTAI</i> |

### H

|              |              |              |              |              |              |              |
|--------------|--------------|--------------|--------------|--------------|--------------|--------------|
| <i>H3F3A</i> | <i>HDAC1</i> | <i>HDAC2</i> | <i>HDAC3</i> | <i>HDAC4</i> | <i>HDAC6</i> | <i>HDAC8</i> |
|--------------|--------------|--------------|--------------|--------------|--------------|--------------|

|            |              |               |                |              |               |                 |
|------------|--------------|---------------|----------------|--------------|---------------|-----------------|
| <i>HGF</i> | <i>HIF1A</i> | <i>HNF1A*</i> | <i>HOXB13*</i> | <i>HRAS*</i> | <i>HSD3B1</i> | <i>HSP90AA1</i> |
|------------|--------------|---------------|----------------|--------------|---------------|-----------------|

**I**

|              |              |              |              |               |             |              |
|--------------|--------------|--------------|--------------|---------------|-------------|--------------|
| <i>IDH1</i>  | <i>IDH2</i>  | <i>IGF1R</i> | <i>IGF1</i>  | <i>IGF2R</i>  | <i>IGF2</i> | <i>IKBKB</i> |
| <i>IKBKE</i> | <i>IKZF1</i> | <i>IL7R</i>  | <i>INHBA</i> | <i>INPP4B</i> | <i>IRF2</i> | <i>IRF4</i>  |
| <i>IRS2</i>  | <i>ITK</i>   |              |              |               |             |              |

**J**

|             |             |             |            |  |  |  |
|-------------|-------------|-------------|------------|--|--|--|
| <i>JAK1</i> | <i>JAK2</i> | <i>JAK3</i> | <i>JUN</i> |  |  |  |
|-------------|-------------|-------------|------------|--|--|--|

**K**

|              |              |              |              |              |              |             |
|--------------|--------------|--------------|--------------|--------------|--------------|-------------|
| <i>KAT6A</i> | <i>KDM5A</i> | <i>KDM5C</i> | <i>KDM6A</i> | <i>KDR</i>   | <i>KEAP1</i> | <i>KEL</i>  |
| <i>KIT*</i>  | <i>KLHL6</i> | <i>KMT2A</i> | <i>KMT2B</i> | <i>KMT2C</i> | <i>KMT2D</i> | <i>KRAS</i> |

**L**

|             |              |              |            |              |              |  |
|-------------|--------------|--------------|------------|--------------|--------------|--|
| <i>LMO1</i> | <i>LRP1B</i> | <i>LRRK2</i> | <i>LYN</i> | <i>LYRM9</i> | <i>LZTR1</i> |  |
|-------------|--------------|--------------|------------|--------------|--------------|--|

**M**

|              |               |               |               |               |               |               |
|--------------|---------------|---------------|---------------|---------------|---------------|---------------|
| <i>MAGI2</i> | <i>MAP2K1</i> | <i>MAP2K2</i> | <i>MAP2K4</i> | <i>MAP3K1</i> | <i>MAP4K1</i> | <i>MAPK14</i> |
| <i>MAPK1</i> | <i>MAPK8</i>  | <i>MAPK9</i>  | <i>MAX*</i>   | <i>MCL1</i>   | <i>MDM2</i>   | <i>MDM4</i>   |
| <i>MED12</i> | <i>MEF2B</i>  | <i>MEN1*</i>  | <i>MET*</i>   | <i>MITF*</i>  | <i>MLH1*</i>  | <i>MMP12</i>  |
| <i>MMP14</i> | <i>MMP9</i>   | <i>MPL</i>    | <i>MRE11*</i> | <i>MSH2*</i>  | <i>MSH3*</i>  | <i>MSH6*</i>  |
| <i>MTHFR</i> | <i>MTOR</i>   | <i>MTR</i>    | <i>MUTYH*</i> | <i>MYB</i>    | <i>MYCL</i>   | <i>MYCN</i>   |
| <i>MYC</i>   | <i>MYD88</i>  | <i>MYO1B</i>  |               |               |               |               |

**N**

|               |               |               |               |               |               |               |
|---------------|---------------|---------------|---------------|---------------|---------------|---------------|
| <i>NAT1</i>   | <i>NAT2</i>   | <i>NBN*</i>   | <i>NCOR1</i>  | <i>NF1*</i>   | <i>NF2*</i>   | <i>NFE2L2</i> |
| <i>NFKBIA</i> | <i>NKX2-1</i> | <i>NOTCH1</i> | <i>NOTCH2</i> | <i>NOTCH3</i> | <i>NOTCH4</i> | <i>NPM1</i>   |
| <i>NRAS</i>   | <i>NRG1</i>   | <i>NSD1*</i>  | <i>NTRK1</i>  | <i>NTRK2</i>  | <i>NTRK3</i>  | <i>NUP93</i>  |

**O**

|              |  |  |  |  |  |  |
|--------------|--|--|--|--|--|--|
| <i>OPRM1</i> |  |  |  |  |  |  |
|--------------|--|--|--|--|--|--|

**P**

|               |                |                 |               |               |               |                 |
|---------------|----------------|-----------------|---------------|---------------|---------------|-----------------|
| <i>PAK1</i>   | <i>PAK3</i>    | <i>PALB2*</i>   | <i>PARP1</i>  | <i>PARP2</i>  | <i>PARP3</i>  | <i>PARP4</i>    |
| <i>PAX5</i>   | <i>PBRM1</i>   | <i>PDCD1LG2</i> | <i>PDCD1</i>  | <i>PDGFRA</i> | <i>PDGFRB</i> | <i>PDK1</i>     |
| <i>PEG3</i>   | <i>PHOX2B*</i> | <i>PIK3C2B</i>  | <i>PIK3CA</i> | <i>PIK3CB</i> | <i>PIK3CG</i> | <i>PIK3R1</i>   |
| <i>PIK3R2</i> | <i>PLCG2</i>   | <i>PLK1</i>     | <i>PMS1*</i>  | <i>PMS2*</i>  | <i>POLD1</i>  | <i>POLE</i>     |
| <i>PPARG</i>  | <i>PPP2R1A</i> | <i>PPP2R5B</i>  | <i>PRDM1</i>  | <i>PREX2</i>  | <i>PRF1*</i>  | <i>PRKARIA*</i> |
| <i>PRKCE</i>  | <i>PRKCG</i>   | <i>PRKCI</i>    | <i>PRKDC</i>  | <i>PRKN</i>   | <i>PRRT2</i>  | <i>PRSSI*</i>   |
| <i>PRSS8</i>  | <i>PTCH1*</i>  | <i>PTCH2</i>    | <i>PTEN*</i>  | <i>PTK2</i>   | <i>PTPN11</i> | <i>PTPRD</i>    |

**Q**

|            |  |  |  |  |  |  |
|------------|--|--|--|--|--|--|
| <i>QKI</i> |  |  |  |  |  |  |
|------------|--|--|--|--|--|--|

**R**

|                |               |               |                |                |              |               |
|----------------|---------------|---------------|----------------|----------------|--------------|---------------|
| <i>RAC1</i>    | <i>RAC2</i>   | <i>RAD50*</i> | <i>RAD51C*</i> | <i>RAD51D*</i> | <i>RAD51</i> | <i>RAF1</i>   |
| <i>RANBP2</i>  | <i>RARA</i>   | <i>RARB</i>   | <i>RASSF1</i>  | <i>RASSF8</i>  | <i>RB1*</i>  | <i>RBM10</i>  |
| <i>RECQL4*</i> | <i>REL</i>    | <i>RET*</i>   | <i>RHBDF2*</i> | <i>RHEB</i>    | <i>RHOA</i>  | <i>RICTOR</i> |
| <i>RNF43</i>   | <i>ROCK1</i>  | <i>ROS1</i>   | <i>RPS6KA1</i> | <i>RPS6KB1</i> | <i>RPTOR</i> | <i>RRM1</i>   |
| <i>RUNX1T1</i> | <i>RUNX1*</i> | <i>RUNX2</i>  |                |                |              |               |

**S**

|                |                |                 |                |                |                |                 |
|----------------|----------------|-----------------|----------------|----------------|----------------|-----------------|
| <i>SATB2</i>   | <i>SBDS*</i>   | <i>SDHAF2*</i>  | <i>SDHA*</i>   | <i>SDHB*</i>   | <i>SDHC*</i>   | <i>SDHD*</i>    |
| <i>SETD2*</i>  | <i>SF3B1</i>   | <i>SHH</i>      | <i>SLC10A2</i> | <i>SLC16A7</i> | <i>SLC19A1</i> | <i>SLC22A16</i> |
| <i>SLC28A3</i> | <i>SLCO1B3</i> | <i>SLIT2</i>    | <i>SLX4*</i>   | <i>SMAD2</i>   | <i>SMAD3</i>   | <i>SMAD4*</i>   |
| <i>SMARCA1</i> | <i>SMARCA4</i> | <i>SMARCB1*</i> | <i>SMARCD1</i> | <i>SMO</i>     | <i>SNAI1</i>   | <i>SNAI2</i>    |
| <i>SNCAIP</i>  | <i>SOCS1</i>   | <i>SOD2</i>     | <i>SOX10</i>   | <i>SOX17</i>   | <i>SOX2</i>    | <i>SOX9</i>     |
| <i>SPEN</i>    | <i>SPINK1*</i> | <i>SPOP</i>     | <i>SPTA1</i>   | <i>SRC</i>     | <i>STAG2</i>   | <i>STAT3</i>    |
| <i>STAT4</i>   | <i>STK11*</i>  | <i>STK4</i>     | <i>SUFU*</i>   | <i>SYK</i>     |                |                 |

**T**

|             |             |               |            |             |             |               |
|-------------|-------------|---------------|------------|-------------|-------------|---------------|
| <i>TAF1</i> | <i>TBX3</i> | <i>TCF7L2</i> | <i>TEK</i> | <i>TERT</i> | <i>TET2</i> | <i>TGFBRI</i> |
|-------------|-------------|---------------|------------|-------------|-------------|---------------|

|                |               |                 |                |                |                  |                 |
|----------------|---------------|-----------------|----------------|----------------|------------------|-----------------|
| <i>TGFBR2</i>  | <i>TLR4</i>   | <i>TMEM127*</i> | <i>TMPRSS2</i> | <i>TNFAIP3</i> | <i>TNFRSF11A</i> | <i>TNFRSF14</i> |
| <i>TNFSF11</i> | <i>TNF</i>    | <i>TOP1</i>     | <i>TOP2A</i>   | <i>TP53*</i>   | <i>TPMT</i>      | <i>TPX2</i>     |
| <i>TSC1*</i>   | <i>TSC2*</i>  | <i>TSHR</i>     | <i>TUBA1A</i>  | <i>TUBB</i>    | <i>TUBD1</i>     | <i>TUBE1</i>    |
| <i>TWIST1</i>  | <i>TYMS</i>   |                 |                |                |                  |                 |
| <b>U</b>       |               |                 |                |                |                  |                 |
| <i>U2AF1</i>   | <i>UGT1A1</i> | <i>UGT1A9</i>   | <i>UMPS</i>    |                |                  |                 |
| <b>V</b>       |               |                 |                |                |                  |                 |
| <i>VEGFA</i>   | <i>VEGFB</i>  | <i>VHL*</i>     |                |                |                  |                 |
| <b>W</b>       |               |                 |                |                |                  |                 |
| <i>WEE1</i>    | <i>WISP3</i>  | <i>WNT1</i>     | <i>WNT5A</i>   | <i>WNT6</i>    | <i>WRN*</i>      | <i>WT1*</i>     |
| <b>X</b>       |               |                 |                |                |                  |                 |
| <i>XIAP</i>    | <i>XPA*</i>   | <i>XPC*</i>     | <i>XPO1</i>    | <i>XRCC1</i>   |                  |                 |
| <b>Y</b>       |               |                 |                |                |                  |                 |
| <i>YES1</i>    |               |                 |                |                |                  |                 |
| <b>Z</b>       |               |                 |                |                |                  |                 |
| <i>ZBTB2</i>   | <i>ZNF217</i> | <i>ZNF703</i>   |                |                |                  |                 |

**\* : 106 genetic risk detection gene**
